# Supplementary material for: Parathyroid Hormone-Related Protein (PTHrP) Accelerates Soluble RANKL Signals for Downregulation of Osteogenesis of Bone Mesenchymal Stem Cells
Source: MDPI journal article supplement (doi:10.3390/jcm8060836), 2019-06-12
Supplement: s1 [file s1]

Article

# Parathyroid Hormone-Related Protein (PTHrP) Accelerates Soluble RANKL Signals for Downregulation of Osteogenesis of Bone Mesenchymal Stem Cells

Jeevithan Elango <sup>1</sup>, Saeed Ur Rahman <sup>2</sup>, Yves Henrotin <sup>3</sup>, José Eduardo Maté Sánchez de Val <sup>4</sup>, Bin Bao <sup>1</sup>, Shujun Wang <sup>5</sup>, Bailin Li <sup>1</sup> and Wenhui Wu <sup>1,6,\*</sup>

<sup>1</sup> Department of Marine Bio-Pharmacology, College of Food Science and Technology, Shanghai Ocean University, Shanghai, 201306, China; srijeevithan@gmail.com (J.E.); bbao@shou.edu.cn (B.B.); blli@shou.edu.cn (B.L.)

<sup>2</sup> Interdisciplinary Research Centre in Biomedical Materials (IRCBM), COMSATS University Islamabad, Lahore Campus, Punjab, 54000, Pakistan; saeedbio80@gmail.com

<sup>3</sup> Bone and Cartilage Research Unit, Arthropôle Liège, University of Liège, CHU Sart-Tilman 4000, Liege, Belgium; yhenrotin@ulg.ac.be

<sup>4</sup> Department of Biomaterials Engineering, Universidad Católica San Antonio de Murcia, 30107 Guadalupe, Murcia, Spain; jemate@ucam.edu

<sup>5</sup> Co-Innovation Center of Jiangsu Marine Bio-industry Technology, Huaihai Institute of Technology, Lianyungang, 222005, China; shujunwang86@163.com

<sup>6</sup> National R&D Branch Center for Freshwater Aquatic Products Processing Technology (Shanghai), Shanghai 201306, China

\* Correspondence: whwu@shou.edu.cn; Tel.: +86 21 61900364

Received: 17 April 2019; Accepted: 7 June 2019; Published: 12 June 2019

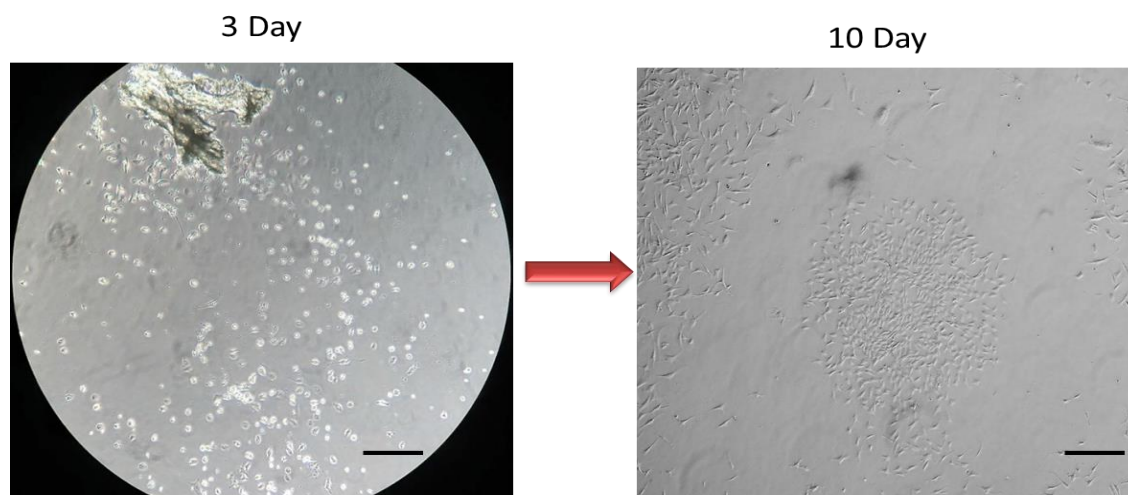

**Figure S1.** Phase contrast microscopic structure of mesenchymal stem cell harvested from BALB/c mouse compact bone. (A) 3 day culture (Bar-100 micrometer) (B) 10 day culture (Bar-50 micrometer).

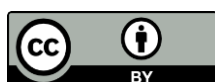

© 2019 by the authors. Licensee MDPI, Basel, Switzerland. This article is an open access article distributed under the terms and conditions of the Creative Commons Attribution (CC BY) license (<http://creativecommons.org/licenses/by/4.0/>).
